# Supplementary material for: Tumor heterogeneity of pancreas head cancer assessed by CT texture analysis: association with survival outcomes after curative resection
Source: PubMed Central journal article supplement (PMC5940761; doi:10.1038/s41598-018-25627-x), 2018-05-08
Supplement: 41598_2018_25627_MOESM1_ESM.pdf [file 41598_2018_25627_MOESM1_ESM.pdf]

**Tumor heterogeneity of pancreas head cancer assessed by CT texture analysis: association with survival outcomes after curative resection**

Gabin Yun, MD<sup>1</sup>, Young Hoon Kim, MD<sup>1,\*</sup>, Yoon Jin Lee, MD<sup>1</sup>, Bohyoung Kim, PhD<sup>1,2</sup>, Jin-Hyeok Hwang, MD, PhD<sup>3</sup>, Dong Joon Choi<sup>1</sup>

**Supplementary Table S1.** LOOCV optimal cutoff and Mean AUC

|                    | Filter = 0        | Filter = 1.0      | Filter = 1.5      | Filter = 2.0      | Filter = 2.5      |
|--------------------|-------------------|-------------------|-------------------|-------------------|-------------------|
| Average            | ≤1098.343 (0.736) | ≤1084.931 (0.736) | ≤1088.576 (0.735) | ≤1091.061 (0.733) | ≤1092.656 (0.731) |
| Standard Deviation | ≤16.19463 (0.709) | ≤31.43487 (0.699) | ≤13.50587 (0.687) | ≤10.57972 (0.665) |                   |
| Contrast           | ≤204.3934 (0.692) | ≤905.8061 (0.679) | ≤89.96422 (0.683) | ≤34.29008 (0.685) | ≤29.17734 (0.665) |
| Correlation        | >0.002776 (0.698) | >0.000517 (0.691) | >0.00398 (0.683)  | >0.008031 (0.659) |                   |

*Note—AUC values are in parentheses*
